# Supplementary material for: Ribosome Rescue and Translation Termination at Non-Standard Stop Codons by ICT1 in Mammalian Mitochondria
Source: PubMed Central journal article supplement (PMC4169044; doi:10.1371/journal.pgen.1004616), 2014-09-18

**A**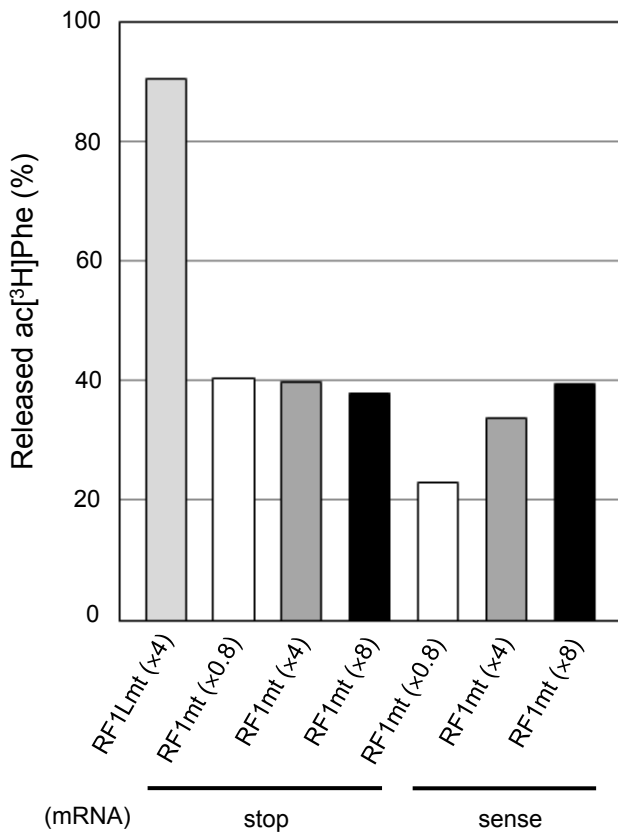**B**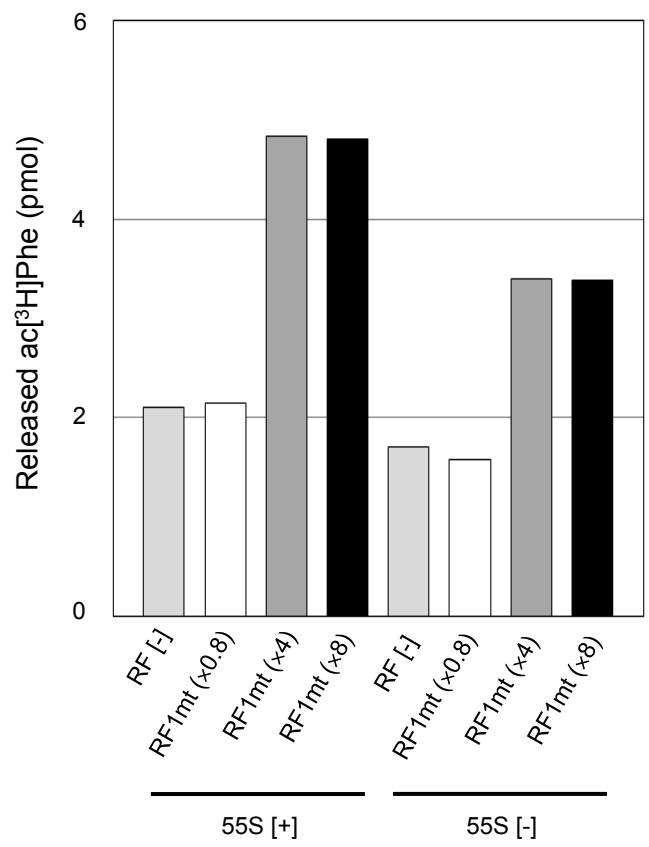

Supplement: pgen.1004616.s001.pdf [file pgen.1004616.s001.pdf]
